# Supplementary material for: Treatment of Type 2 Diabetes by Patient Profile in the Clinical Practice of Endocrinology in Spain: Delphi Study Results from the Think Twice Program
Source: PubMed Central journal article supplement — Diabetes Ther. 2019 Jul 29;10(5):1893–907. doi: 10.1007/s13300-019-0671-x (PMC6778580; doi:10.1007/s13300-019-0671-x), 2019-07-29
Supplement: 13300_2019_671_MOESM1_ESM.pdf [file 13300_2019_671_MOESM1_ESM.pdf]

**Supplemental Table 1.** Internal consistency of the questionnaire

|                              | First round   |                  |              |                  | Second round  |                  |              |                  |
|------------------------------|---------------|------------------|--------------|------------------|---------------|------------------|--------------|------------------|
|                              | $\alpha$ de C | p                | $r_i$        | p                | $\alpha$ de C | p                | $r_i$        | p                |
| <b>TOTAL (55 items)</b>      | <b>0.857</b>  | <b>&lt;0.001</b> | <b>0.855</b> | <b>&lt;0.001</b> | <b>0.780</b>  | <b>&lt;0.001</b> | <b>0.760</b> | <b>&lt;0.001</b> |
| Overall sentences (11 items) | 0.721         | <0.001           | 0.715        | <0.001           | 0.672         | <0.001           | 0.660        | <0.001           |
| Case 1 (8 items)             | 0.580         | <0.001           | 0.563        | <0.001           | 0.534         | <0.001           | 0.500        | <0.001           |
| Case 2 (12 items)            | 0.719         | <0.001           | 0.714        | <0.001           | 0.701         | <0.001           | 0.685        | <0.001           |
| Case 3 (7 items)             | 0.749         | <0.001           | 0.735        | <0.001           | 0.706         | <0.001           | 0.675        | <0.001           |
| Case 4 (9 items)             | 0.718         | <0.001           | 0.692        | <0.001           | 0.769         | <0.001           | 0.722        | <0.001           |
| Case 5 (8 items)             | 0.663         | <0.001           | 0.656        | <0.001           | 0.610         | <0.001           | 0.595        | <0.001           |

**Supplemental Table 2.** Correlation (Spearman R:  $r_s$ ) and qualitative agreement (Kappa index:  $k$ ) between the two rounds of the questionnaire

|                              | $r_s$        | $p$              | $k$          | $p$              |
|------------------------------|--------------|------------------|--------------|------------------|
| <b>TOTAL (55 items)</b>      | <b>0.764</b> | <b>&lt;0.001</b> | <b>0.726</b> | <b>&lt;0.001</b> |
| Overall sentences (11 items) | 0.865        | <0.001           | 0.839        | <0.001           |
| Case 1 (8 items)             | 0.432        | 0.092            | 0.410        | 0.120            |
| Case 2 (12 items)            | 0.614        | 0.013            | 0.602        | 0.021            |
| Case 3 (7 items)             | 0.775        | 0.001            | 0.752        | 0.001            |
| Case 4 (9 items)             | 0.682        | 0.009            | 0.675        | 0.008            |
| Case 5 (8 items)             | 0.782        | <0.001           | 0.766        | <0.001           |

**Supplemental Material 3.** The authors would like to extend their special thanks to the participants in the local meetings of the Think Twice program:

Pablo Abellán (Hospital General Universitario de Castellón, Castellón, Spain), Cristina Abreu (Hospital General de Segovia, Segovia, Spain), Javier Acha (Hospital Universitario Miguel Servet, Zaragoza, Spain), Enric Ballestar (Hospital Mataró, Mataró, Spain), María Orosia Bandrés (Hospital Royo Villanova, Zaragoza, Spain), Manuel Antonio Botana (Hospital Universitario Lucus Augusti, Lugo, Spain), Miguel Brito (Hospital Puerta de Hierro, Majadahonda, Madrid), Rosa María Burgo (Hospital Monforte Lemos. Monforte de Lemos, Spain), José Manuel Cabezas (Complejo Hospitalario Universitario de Santiago de Compostela, Santiago de Compostela, Spain), Francisco Cañizo (Hospital Universitario Infanta Leonor, Madrid, Spain), Ismael Capel (Hospital Universitari Parc Taulí, Sabadell), Rosa Casañ (Hospital Lluís Alcanyies de Xàtiva, Valencia, Spain), José Antonio Chena (Hospital General San Jorge, Huesca, Spain), Luis Cuéllar (Hospital Universitario Río Hortega, Valladolid, Spain), María Belén Dalama (Hospital Universitari Vall d'Hebrón, Barcelona, Spain), José Ramón Domínguez (Hospital Universitario de San Juan de Alicante, Alicante, Spain), Eduardo Esteve (Hospital Universitari Dr. Josep Trueta, Girona, Spain), Carmen Fajardo (Hospital Universitari de la Ribera, Alzira, Valencia, Spain), Diego Fernández (Hospital Universitario Virgen de la Victoria, Málaga, Spain), Pablo Fernández Catalina (Hospital Montecelo, Pontevedra, Spain), Juan Carlos Ferrer (Hospital General Universitario de Valencia, Valencia, Spain), Luis Máximo García (Hospital Universitari Mútua de Terrassa, Terrassa, Spain), Yolanda García (Hospital Universitario de Galdakao, Spain), Manuel Gargallo (Hospital Universitario Infanta Leonor, Madrid, Spain), Sonia Gaztambide (Hospital Universitario de Cruces, Baracaldo, Spain), José Antonio Gimeno (Hospital Clínico Universitario Lozano Blesa, Zaragoza, Spain), Antonio Gippini (Complejo Universitario de Orense, Orense, Spain), Juan Girbés (Hospital Arnau de Vilanova, Valencia, Spain), Olga González (Hospital Universitario Gregorio Marañón, Madrid, Spain), María José Goñi (Complejo Hospitalario de Navarra, Pamplona, Spain), Carlos Guzmán (Hospital de Don Benito Villanueva de la Serena, Badajoz, Spain), Antonio Hernández (Hospital Universitario Virgen de la

Arrixaca, Murcia, Spain), Cristina Hernández (Hospital Universitario Virgen Macarena, Sevilla, Spain), Enrique Hernández (Hospital General Universitario Santa Lucía de Cartagena, Murcia, Spain), Emilia Hoyos (Hospital Clínico Universitario de Valladolid, Valladolid, Spain), Ana Isabel Jiménez (Hospital Universitario Puerta del Mar, Cádiz, Spain), María Laínez (Hospital Universitario Juan Ramón Jiménez, Huelva, Spain), Arturo Lisbona (Hospital Universitario La Paz, Madrid, Spain), Ignacio Llorente (Hospital Universitario Nuestra Sra de La Candelaria, Tenerife, Spain), José Antonio López-Miranda (Hospital Universitario Virgen de la Victoria, Málaga, Spain), Martín López (Hospital Universitario Virgen de las Nieves, Granada, Spain), Gonzalo Fernando Maldonado (Hospital Universitario Araba, Vitoria, Spain), Miguel Ángel Mangas (Hospital Universitario Virgen del Rocío, Sevilla, Spain), Beatriz Mantiñán (Hospital Álvaro Cunqueiro, Vigo, Spain), José María Manzanares (Hospital Universitari Sant Joan, Reus, Spain), Amparo Marco (Hospital Virgen de la Salud, Toledo, Spain), Emilio Ortega Martínez (Hospital Clínic, Barcelona, Spain), María Ángeles Martínez (Hospital General de la Rioja, Logroño, Spain), Ana Isabel Megía (Hospital Universitari Joan XXIII, Tarragona, Spain), Francisco Morales (Hospital Universitario de Badajoz, Badajoz, Spain), Alberto Moreno (Complejo Hospitalario de Jaén, Jaén, Spain), Amelia Oleaga (Hospital Universitario de Basurto, Bilbao, Spain), Carlos Pardo (Hospital Virgen de los Lirios de Alcoy, Alicante, Spain), Francisco Javier Peñafiel (Hospital Universitario de Torrecárdenas, Almería, Spain), Manuel Pérez (Hospital Universitari de Bellvitge, L'Hospitalet, Spain), Iria Pinal (Hospital Verin, Orense, Spain), Margarita Rivas (Hospital Universitario de Valme, Sevilla, Spain), Pedro Rozas (Hospital General Universitario de Ciudad Real, Ciudad Real, Spain), José Manuel Ruiz (Hospital General Universitario de Elda, Alicante, Spain), Estefanía Santos (Hospital Universitario de Burgos, Burgos, Spain), María Dolores Santos (Hospital Universitari Arnau de Vilanova, Lleida, Spain), Camilo Silva (Clínica Universidad de Navarra, Pamplona, Spain), Alfonso Soto (Hospital Universitario A Coruña, A Coruña, Spain), Cristina Tejera (Hospital Arquitecto Marcide, Complejo Universitario de Ferrol, El Ferrol, Spain), Susana Tenés (Hospital Universitario y Politécnico La Fe, Valencia, Spain), Francisco Varillas (Hospital General de Fuerteventura Virgen de la Peña, Fuerteventura, Spain), Alfredo Yoldi (Hospital Universitario de Donostia, San

Sebastián, Spain).
